# Supplementary material for: Ultra-high electrical conductivity and superior bendability simultaneously enabled in Ag nanowire based nanocomposites
Source: Royal Society of Chemistry journal article supplement (doi:10.1039/c7ra07714a), 2017-01-01
Supplement: c7ra07714a2.pdf [file c7ra07714a2.pdf]

## Electronic Supplementary Information

### Ultra-high electrical conductivity and superior bendability simultaneously enabled in Ag nanowire based nanocomposites

Minhong He,<sup>a‡</sup> Xinfang Gao,<sup>b‡</sup> Bin Liu,<sup>b</sup> Jun Zhou<sup>b\*</sup> and Ziqi Liang<sup>a\*</sup>

<sup>a</sup> Department of Materials Science, Fudan University, Shanghai 200433, China.

E-mail: zqliang@fudan.edu.cn

<sup>b</sup> Center for Phononics and Thermal Energy Science; China-EU Joint Center for Nanophonics and Shanghai Key Laboratory of Special Artificial Microstructure Materials and Technology, School of Physics Science and Engineering, Tongji University, Shanghai 200092, China.

Email: zhoujunzhou@tongji.edu.cn

## Experimental

### Materials

All the reagents used in the experiments were used without further purification, including Ag NWs (JCNANO Tech Co., Ltd), PVDF (M. W. = 900 kDa, Arkem, Ltd), DMF (J&K Scientific, Ltd).

### Methods

A typical fabrication procedure of Ag NWs/PVDF nanocomposites is described as follows. First, 0.1 g PVDF was added into 0.9 g DMF in a 50 mL flask under vigorous stirring at 70 °C for 3 h, followed by room temperature for 24 h. Then different amounts of Ag NWs (5, 10, 15, 20, 30, 40, 50, 60, 70 and 80 wt%) were dispersed into the PVDF solution under mild stirring at room temperature for 1 h. Afterwards, Ag NWs/PVDF bulky nanocomposites were prepared by drop-casting the mixture solution in aluminium molds in a N<sub>2</sub>-filled glovebox, followed by drying at 40 °C overnight. These bulky nanocomposites were then peeled off from aluminium molds and then thermal annealed at 135 °C for 30 min.

### Characterizations and measurements

Electrical properties of the nanocomposites were measured at room temperature. A four-probe technique was used to measure electrical conductivity on a multimeter (Keithley 2010) and a source meter (Keithley 2400). Field-emission scanning electron microscopy images were acquired on JEOL JSM-6701F at an accelerating voltage of up to 30 kV. X-ray diffraction pattern data for 2θ values were collected with a Bruker AX D8 Advance diffractometer with Ni filtered Cu Kα radiation (λ = 1.5406 Å).

**Table S1** The σ value and the film thickness for each Ag NWs fraction

| Ag (wt%) | σ (S/cm)              | Standard deviation    | d (cm) | Standard deviation |
|----------|-----------------------|-----------------------|--------|--------------------|
| 5        | $3.68 \times 10^{-6}$ | $8.62 \times 10^{-8}$ | 0.0088 | 0.000195           |
| 10       | $1.58 \times 10^{-1}$ | $1.18 \times 10^{-2}$ | 0.0092 | 0.000210           |
| 15       | 56.5                  | 2.45                  | 0.0050 | 0.000148           |
| 20       | $3.84 \times 10^2$    | 21.67                 | 0.0076 | 0.000179           |

|    |                    |                    |        |          |
|----|--------------------|--------------------|--------|----------|
| 30 | $4.56 \times 10^2$ | 16.83              | 0.0068 | 0.000195 |
| 40 | $5.00 \times 10^2$ | 17.07              | 0.0060 | 0.000167 |
| 50 | $1.55 \times 10^3$ | $1.57 \times 10^2$ | 0.0022 | 0.000126 |
| 60 | $6.49 \times 10^3$ | $2.26 \times 10^2$ | 0.0060 | 0.000167 |
| 70 | $1.02 \times 10^4$ | $5.13 \times 10^2$ | 0.0042 | 0.000161 |
| 80 | $1.77 \times 10^4$ | $1.05 \times 10^3$ | 0.0017 | 0.000100 |
